# Supplementary material
Source: PubMed Central journal article supplement (PMC3078809)
Supplement: supp_124_9_1403__1.pdf [file supp_124_9_1403__1.pdf]

**Table S1. Strains and plasmids used in this study.**

| <b>Strains</b>          | <b>Genotypes</b>                                                                                                                                                                                  | <b>Reference</b>         |
|-------------------------|---------------------------------------------------------------------------------------------------------------------------------------------------------------------------------------------------|--------------------------|
| DCY538                  | <i>MATa</i> ; <i>ura3-52</i> ; <i>his3Δ200</i> ; <i>leu2Δ1</i> ; <i>trp1Δ63</i> ; <i>lys2Δ202</i> ; <i>FZO1::HIS3</i> ; <i>leu2::GPD-mitoGFP-LEU2</i> ; <i>pRS416-FZO1</i>                        | (Griffin and Chan, 2006) |
| DCY538 <i>mdm30Δ</i>    | <i>MATa</i> ; <i>ura3-52</i> ; <i>his3Δ200</i> ; <i>leu2Δ1</i> ; <i>trp1Δ63</i> ; <i>lys2Δ202</i> ; <i>FZO1::HIS3</i> ; <i>MDM30::kanMX6</i> ; <i>leu2::GPD-mitoGFP-LEU2</i> ; <i>pRS416-FZO1</i> | This study               |
| JSY2294                 | <i>MATα</i> ; <i>ade2-1</i> ; <i>leu2-3</i> ; <i>his3-11,15</i> ; <i>trp1-1</i> ; <i>ura3-1</i> ; <i>can1-100</i> ; <i>FZO1::HIS3</i> ; <i>pRS416-FZO1</i>                                        | J. Shaw                  |
| JSY2294 <i>mdm30Δ</i>   | <i>MATα</i> ; <i>ade2-1</i> ; <i>leu2-3</i> ; <i>his3-11,15</i> ; <i>trp1-1</i> ; <i>ura3-1</i> ; <i>can1-100</i> ; <i>FZO1::HIS3</i> ; <i>MDM30::kanMX6</i> ; <i>pRS416-FZO1</i>                 | This study               |
| JSY2293                 | <i>MATa</i> ; <i>ade2-1</i> ; <i>leu2-3</i> ; <i>his3-11,15</i> ; <i>trp1-1</i> ; <i>ura3-1</i> ; <i>can1-100</i> ; <i>FZO1::HIS3</i> ; <i>pRS416-FZO1</i>                                        | J. Shaw                  |
| JSY2293 <i>mdm30Δ</i>   | <i>MATa</i> ; <i>ade2-1</i> ; <i>leu2-3</i> ; <i>his3-11,15</i> ; <i>trp1-1</i> ; <i>ura3-1</i> ; <i>can1-100</i> ; <i>FZO1::HIS3</i> ; <i>MDM30::kanMX6</i> ; <i>pRS416-FZO1</i>                 | This study               |
| <b>Plasmids</b>         |                                                                                                                                                                                                   | <b>Reference</b>         |
| pUb70 (empty vector)    | 2 micron, <i>CUP1</i> promoter, <i>LYS2</i> , Amp                                                                                                                                                 | D. Finley                |
| pRS-414(empty vector)   | CEN, <i>TRP1</i> , Amp                                                                                                                                                                            | (Mumberg et al., 1995)   |
| pFZO1                   | CEN, <i>FZO1</i> promoter- <i>FZO1</i> , <i>TRP1</i> , Amp                                                                                                                                        | This study               |
| pFZO1-S201N             | CEN, <i>FZO1</i> promoter- <i>FZO1 S201N</i> , <i>TRP1</i> , Amp                                                                                                                                  | This study               |
| pUb-M-FZO1              | CEN, <i>FZO1</i> promoter- <i>Ub-M-FZO1</i> , <i>TRP1</i> , Amp                                                                                                                                   | This study               |
| pUb-Y-FZO1              | CEN, <i>FZO1</i> promoter- <i>Ub-Y-FZO1</i> , <i>TRP1</i> , Amp                                                                                                                                   | This study               |
| pUb-R-FZO1              | CEN, <i>FZO1</i> promoter- <i>Ub-R-FZO1</i> , <i>TRP1</i> , Amp                                                                                                                                   | This study               |
| pUb-Y-FZO1-S201N        | CEN, <i>FZO1</i> promoter- <i>Ub-Y-FZO1 S201N</i> , <i>TRP1</i> , Amp                                                                                                                             | This study               |
| pUb-R-FZO1-S201N        | CEN, <i>FZO1</i> promoter- <i>Ub-R-FZO1 S201N</i> , <i>TRP1</i> , Amp                                                                                                                             | This study               |
| pFZO1-HA                | CEN, <i>FZO1</i> promoter- <i>FZO1-3HA</i> , <i>TRP1</i> , Amp                                                                                                                                    | This study               |
| pFZO1- K200A-HA         | CEN, <i>FZO1</i> promoter- <i>FZO1-3HA K200A</i> , <i>TRP1</i> , Amp                                                                                                                              | This study               |
| pFZO1- S201N-HA         | CEN, <i>FZO1</i> promoter- <i>FZO1-3HA S201N</i> , <i>TRP1</i> , Amp                                                                                                                              | This study               |
| pFZO1- T221S-HA         | CEN, <i>FZO1</i> promoter- <i>FZO1-3HA T221S</i> , <i>TRP1</i> , Amp                                                                                                                              | This study               |
| pFZO1- L518P-HA         | CEN, <i>FZO1</i> promoter- <i>FZO1-3HA L518P</i> , <i>TRP1</i> , Amp                                                                                                                              | This study               |
| pFZO1- L819P-HA         | CEN, <i>FZO1</i> promoter- <i>FZO1-3HA L819P</i> , <i>TRP1</i> , Amp                                                                                                                              | This study               |
| pFZO1 - S201N- L518P-HA | CEN, <i>FZO1</i> promoter- <i>FZO1-3HA S201N, L518P</i> , <i>TRP1</i> , Amp                                                                                                                       | This study               |
| pUb-M-FZO1-HA           | CEN, <i>FZO1</i> promoter- <i>Ub-M-FZO1-3HA</i> , <i>TRP1</i> , Amp                                                                                                                               | This study               |
| pUb-Y-FZO1-HA           | CEN, <i>FZO1</i> promoter- <i>Ub-Y-FZO1-3HA</i> , <i>TRP1</i> , Amp                                                                                                                               | This study               |
| pUb-R-FZO1-HA           | CEN, <i>FZO1</i> promoter- <i>Ub-R-FZO1-3HA</i> , <i>TRP1</i> , Amp                                                                                                                               | This study               |
| pHA-FZO1                | CEN, <i>FZO1</i> promoter- <i>6HA-FZO1</i> , <i>TRP1</i> , Amp                                                                                                                                    | (Griffin and Chan, 2006) |
| pHA-HR1/HR2             | CEN, <i>FZO1</i> promoter- <i>6HA- HR1/HR2</i> , <i>LYS2</i> , Amp                                                                                                                                | (Griffin and Chan, 2006) |
| pMYC-FZO1               | CEN, <i>FZO1</i> promoter- <i>6MYC-FZO1</i> , <i>TRP1</i> , Amp                                                                                                                                   | (Griffin and Chan, 2006) |
| pMYC-HRN/GTPase         | CEN, <i>FZO1</i> promoter- <i>6MYC-HRN/GTPase</i> , <i>TRP1</i> , Amp                                                                                                                             | (Griffin and Chan, 2006) |
| p6MYC-HRN/GTPase S201N  | CEN, <i>FZO1</i> promoter- <i>6MYC-HRN/GTPase S201N</i> , <i>TRP1</i> , Amp                                                                                                                       | This study               |
| pTEF-MDM30-MYC          | 2 micron, <i>TEF</i> promoter- <i>MDM30-MYC</i> , <i>URA3</i> , Amp                                                                                                                               | This study               |
| pTEF-fbox-MYC           | 2 micron, <i>TEF</i> promoter- <i>mdm30-MYC fbox</i> , <i>URA3</i> , Amp                                                                                                                          | This study               |
| pTEF-fbox-HA            | 2 micron, <i>TEF</i> promoter- <i>mdm30-HA fbox</i> , <i>URA3</i> , Amp                                                                                                                           | (Cohen et al., 2008)     |
| pTEF-mito-DsRed T4      | 2 micron, <i>TEF</i> promoter- <i>Su9-DsRed T4</i> , <i>URA3</i> , Amp                                                                                                                            | This study               |
| pMito-Red               | 2 micron, <i>TEF</i> promoter- <i>CoxIV-DsRed</i> , <i>LEU2</i> , Amp                                                                                                                             | J. Shaw                  |
